# Supplementary material for: Association of Visitor Contact Precautions With Estimated Hospital-Onset Clostridioides difficile Infection Rates in Acute Care Hospitals
Source: PubMed Central journal article supplement (PMC7910816; doi:10.1001/jamanetworkopen.2021.0361), 2021-02-26
Supplement: jamanetwopen-e210361-s001.pdf [file jamanetwopen-e210361-s001.pdf]

## Supplementary Online Content

Scaria E, Barker AK, Alagoz O, Safdar N. Association of visitor contact precautions with estimated hospital-onset *Clostridioides difficile* infection rates in acute care hospitals. *JAMA Netw Open*. 2021;4(2):e210361. doi:10.1001/jamanetworkopen.2021.0361

### eAppendix

**eTable 1.** Clinical states of the patients included in the discrete-time Markov chain

**eFigure.** Possible transitions between CDI disease states

**eTable 2.** Key input parameters

**eTable 3.** Performance of infection control measures implemented at enhanced adherence, as quantified by NetLogo and Java simulation

**eTable 4.** Performance of infection control measures implemented at ideal adherence, as quantified by NetLogo and Java simulation

**eTable 5.** Stability of baseline infection outcomes as a function of number of replications, as quantified by NetLogo and Java models

**eTable 6.** HO-CDI per 10,000 patient days as a function of compliance with surveillance, under maximal visitor transmission

**eTable 7.** HO-CDI per 10,000 patient days with VCPs in use for all patients

**eTable 8.** Changes in hand hygiene and cleaning compliance associated with reduction in HO-CDI/10,000 patient days on par with that of VCPs ideal intervention

### eReferences

This supplementary material has been provided by the authors to give readers additional information about their work.

## **eAppendix**

### *Representing patient disease state*

Patient *Clostridioides difficile* infection (CDI) state is modeled using a discrete-time Markov chain containing nine states, as described in eTable 1. The states of death and non-susceptible are absorbing, from which patients cannot transition to any other state. Possible transitions between disease states are illustrated in the eFigure.

### *Input parameters for the baseline model configuration*

All infection control interventions included in the agent-based simulation model can be implemented at multiple levels representing varying compliance with protocols. Interventions can be implemented at the baseline level, representing minimal (if any) institutional support, and therefore have the least agent compliance. Interventions can also be implemented at an ideal level, representing significant institutional support and agent compliance. The simulation model includes several parameters to describe the baseline state, distribution, and behavior of agents in the model. The parameters that were directly referenced or altered in our study of VCPs de-implementation are described in eTable 2. For a full description of the model's input parameters and their derivations, please see Barker, et al 2018.<sup>1</sup>

### *Detailed description of visitor behavior*

Visitors may enter the simulation between the in-model hours of 9:00am and 9:00pm. When visitor agents are initialized, they are assigned a length of stay according to an exponential distribution with a mean of 15 minutes. While the visitor is in the patient room, healthcare workers may enter and interact with the patient and the environment, but not with the visitor. After the visitor has completed their stay, probabilities for patient-to-visitor and environment-to-visitor contamination trials are calculated, depending on the visitor length of stay, frequency of

contact, proportion of the room or patient that may harbor *C. difficile* spores, and the transfer efficiency between surfaces. The proportion of the room or patient harboring *C. difficile* depends on the patient's disease status. If either of these probability trials are successful, the visitor is considered contaminated.

Right before leaving the patient room, Bernoulli trials are used to determine if the patient washed their hands upon exit or was wearing VCPs during their stay. These trials are dependent on the compliance and effectiveness of the two interventions. If either trial is successful, the visitor is no longer considered contaminated. The visitor moves to the ward common ward, where they remain for five minutes. The model then calculates the probability for a visitor-to-environment contamination trial, depending on visitor length of stay, frequency of contact, and transfer efficiency between surfaces. If the trial is successful and the visitor was contaminated, high touch surfaces in the common room are considered contaminated. The visitor is then removed from the model.

#### *Conversion of model from NetLogo to Java*

The NetLogo model described in Barker, et al simulates the spread of hospital onset *Clostridioides difficile* infection (HO-CDI) in a generic, 200-bed acute care hospital.<sup>1</sup> Though NetLogo's ease of use and graphical interface are highly useful features in modeling infectious diseases, other programming languages can offer greater flexibility and speed. Java is one such language and lends itself naturally to agent-based modeling because of its object-oriented capabilities. To enable the experiments described in this paper we first converted the model described in Barker et al to an analogous model in Java (version 8); see the Appendix material of Barker et al for detailed logic governing agent and environment interactions.<sup>1</sup>

Coding and debugging of the Java model was completed in Eclipse IDE v4.8 (Photon), developed by the Eclipse Foundation. The Java model replicates the agent and environmental variables and behavior, with changes made as necessary to accommodate Java data structures and objects. Both the NetLogo and Java models use the Colt Project's Mersenne Twister algorithm to produce random number generator streams. ETables 3 and 4 compare the output of the NetLogo and Java models for different infection control measures implemented at the enhanced and ideal levels, respectively. Of primary interest was the percent change in HO-CDI per 10000 patient days and colonizations per 1000 admitted patients as a function of different infection control implementation. Absolute percent changes of less than one percent were considered insignificant. Like the NetLogo model, the Java model was face validated by subject matter experts in hospital associated infections and simulation.

To determine stability of results, HO-CDI per 10000 patient days and colonizations per 1000 admitted patients were examined as a function of number of replications, as seen in eTable 5. As the Java model showed a similar stability at 5000 replications to the NetLogo model, we concluded that 5000 replications were sufficient to produce stable results.

#### *Existence of association between VCPs and HO-CDI reduction*

In the interest of finding what conditions exist in our model, if any, where VCPs are associated with a greater than 1% reduction in HO-CDI rates, we conducted further experiments using large parameter changes. Of primary interest is if there exists a threshold at of visitor length of stay or rate of contact at which VCPs are associated with HO-CDI reductions. In our model, all probabilities related to visitor *C. difficile* acquisition or deposition are of the form:

$$p = 1 - DRe^{-l\lambda}$$

Where:

$p$  = probability of acquisition or deposition  
 $D$  = proportion of environment/patient contaminated with *C. difficile*  
 $R$  = transfer probability of *C. difficile* between patient/environment and visitor  
 $\lambda$  = rate of contact between visitor and environment/patient  
 $l$  = length of stay with patient/in environment

As visitor length of stay and visitor acquisition/deposition rates increase, the probability of transfer rapidly approaches 1. Once the exponential power is on the order of -10, increasing visitor length of stay or rate of contact more do little to affect the probability of exposure. Therefore, there is little need to investigate lengths of stay or rates of contact that result in a power less than -10. We conducted an additional experiment where we multiplied the rates of contact between visitors and the environment and between visitors and patients by 10, thereby bringing the probability of transmission and deposition near to 1. The rate of HO-CDI per 10,000 patient days with no VCPs was 7.95 (95% CI: [7.91, 7.99]), while the rate with ideal VCPs implementation was 7.99 (95% CI: [7.95, 8.03]). As the difference between these average rates is less than one percent, we are confident that increasing the rate of contact or length of stay any further would not lead to a greater association between VCPs and HO-CDI.

We believe it would be of interest to know if there is any condition where VCPs may be associated with a larger reduction in HO-CDI. We found that under extreme conditions where the only possible transmission pathway was through visitors contaminating the common room, transmission to and from visitors was guaranteed, and surveillance testing was adequately high, VCPs could have a larger association with HO-CDI. Note that surveillance testing represents the scenario that patients are screened for *C. difficile* at admission and then are put in isolation therefore VCPs will be implemented. Experiments varying the surveillance testing parameter

are shown in eTable 6. Averages and confidence intervals were calculated from 5000 replications.

Surveillance likely played an important role in the experiments described in eTable 6 because our model assumes that VCPs may only be used when interacting with patients known to be infected or colonized with *C. difficile*. Therefore, increasing surveillance and testing leads to a greater number of known colonizations and infections and thus increased VCPs use. However, even when all patients entering the hospital are tested (i.e., surveillance compliance of 100%), the association of VCPs and HO-CDI is still relatively small.

Under baseline conditions, simply expanding use of VCPs to all patients is not significantly associated with a decrease in HO-CDI, as described in eTable 7.

*eTable 1: Clinical states of the patients included in the discrete-time Markov chain (adapted from Barker et al 2018)<sup>1</sup>*

| <b>Clinical State</b> | <b>Description</b>                                                               |
|-----------------------|----------------------------------------------------------------------------------|
| Non-susceptible       | Not at risk for colonization or CDI                                              |
| Susceptible           | At risk for <i>C. difficile</i> colonization but no symptoms or disease          |
| Exposed               | Exposed to <i>C. difficile</i> but no symptoms or disease                        |
| Colonized             | Gastrointestinal colonization of <i>C. difficile</i> , but no symptoms           |
| Infected              | Clinically diagnosed CDI, symptomatic                                            |
| Cleared               | Experienced infection or colonization but successfully cleared                   |
| Recolonized           | Recovered from infection, but gastrointestinal colonization remains, no symptoms |
| Infection recurrence  | Recurrence of the infection in a previously infected patient, symptomatic        |
| Death                 | CDI-related death                                                                |

Patients in the clinical states that are shaded with gray are contagious, therefore can transmit *C. difficile* to other agents and contaminate the environment, while patients in other clinical states cannot

eFigure: Possible transitions between CDI disease states (adapted from Barker et al 2018)<sup>1</sup>

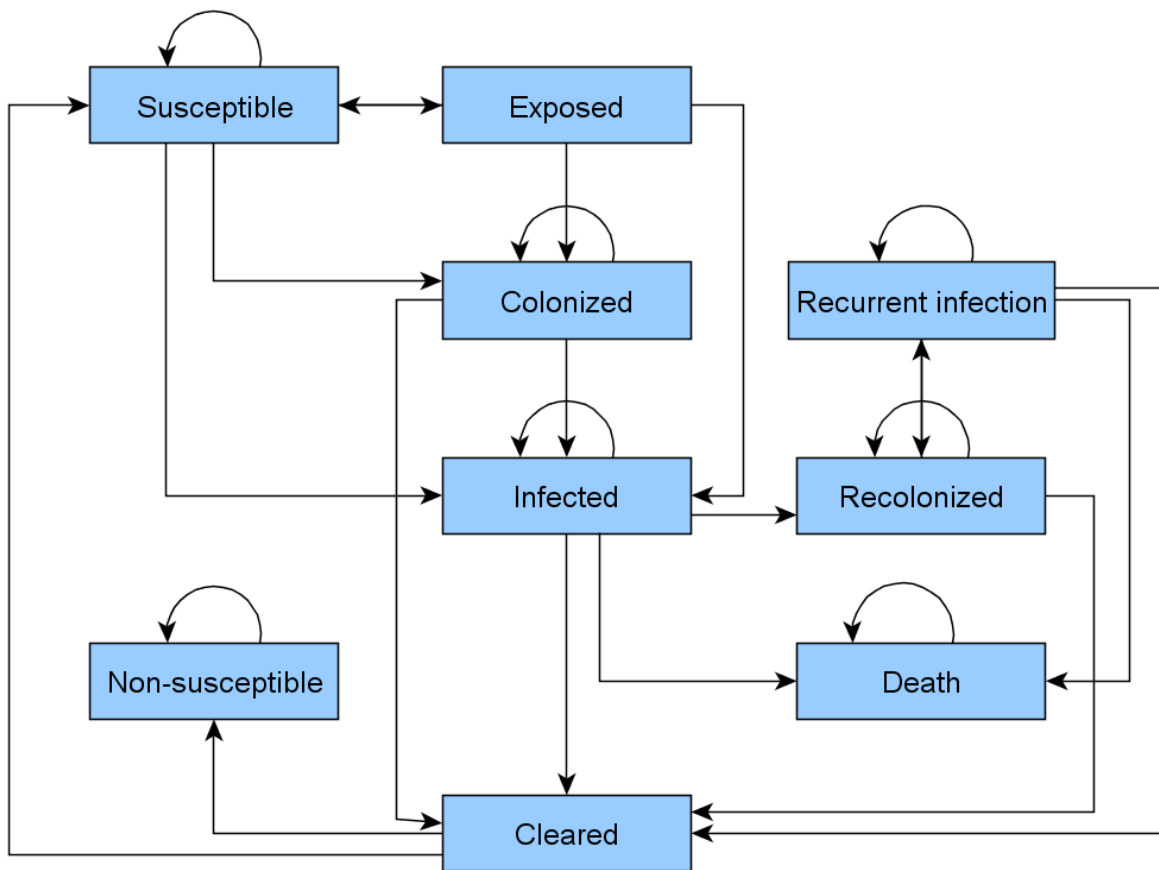



eTable 2: Key Input Parameters (adapted from Barker et al 2018)<sup>1</sup>

| Interventions Parameters                                                            |                                                |                  |             |              |
|-------------------------------------------------------------------------------------|------------------------------------------------|------------------|-------------|--------------|
| Intervention                                                                        | Baseline Compliance                            | Ideal Compliance | Source      | Source Dates |
| Hand Hygiene                                                                        |                                                |                  |             |              |
| Standard Patient                                                                    |                                                |                  |             |              |
| Patient                                                                             | 33%                                            | 84%              | 2-7         | 04/03 - 2014 |
| Nurse                                                                               | 60%                                            | 96%              | 8-18        | 08/2000-2012 |
| Doctor                                                                              | 50%                                            | 91%              | 8-20        | 2000-12/12   |
| Visitor                                                                             | 35%                                            | 84%              | 5,9,21-26   | 06/97 - 2016 |
| CDI Patient                                                                         |                                                |                  |             |              |
| Patient                                                                             | 48%                                            | 88%              | 27-30       | 10/02-12/12  |
| Nurse                                                                               | 69%                                            | 97%              | 27-30       | 10/02-12/12  |
| Doctor                                                                              | 61%                                            | 93%              | 27-30       | 10/02-12/12  |
| Visitor                                                                             | 50%                                            | 88%              | 27-30       | 10/02-12/12  |
| Environmental cleaning                                                              |                                                |                  |             |              |
| Daily Cleaning                                                                      | 46%                                            | 94%              | 31-35       | 03/01-05/12  |
| Terminal cleaning                                                                   | 47%                                            | 98%              | 31,36-39    | 10/11-07/14  |
| Admission Parameters                                                                |                                                |                  |             |              |
| Parameter                                                                           | Mean value                                     |                  | Source      | Source Dates |
| Proportion of susceptible patients                                                  | 39.70%                                         |                  | 40-44       | 01/99-12/12  |
| Proportion of asymptomatic colonized patients                                       | 6.10%                                          |                  | 45-55       | 03/06-03/15  |
| Proportion of patients with CDI                                                     | 0.29%                                          |                  | 45,52,56,57 | 01/09-2016   |
| Proportion of non-susceptible patients                                              | 53.90%                                         |                  | -           |              |
| Patient arrival rate                                                                | 26/day                                         |                  | 58,59       | 01/75-12/15  |
| Health care worker behavior and distribution                                        |                                                |                  |             |              |
| Parameter                                                                           | Value                                          |                  | Source      | Source Dates |
| Patient-nurse contact probability [rate]                                            | 0.358 (for 5 minutes) [10.53 contacts/ minute] |                  | 60          | 06/10-08/10  |
| Patient-doctor contact probability [rate]                                           | 0.688 (for 5 minutes) [9.25 contacts/ minute]  |                  | 60          | 06/10-08/10  |
| Number of nurses per ward                                                           | 4                                              |                  | 60-63       | 04/98-08/10  |
| Number of doctors per ward                                                          | 2                                              |                  | 58,60       | 06/10-12/12  |
| Average nurse service time                                                          | 4.7 minutes                                    |                  | 28,60,64,65 | 06/01-04/13  |
| Average doctor service time                                                         | 10.8 minutes                                   |                  | 28,60,64,65 | 06/01-04/13  |
| Average number of nurse visits per 6 hours                                          | 5                                              |                  | 28,60,66,67 | 06/01-04/13  |
| Average number of doctor visits per 6 hours                                         | 1                                              |                  | 28,60,66,67 | 06/01-04/13  |
| Proportion of patients prescribed fluoroquinolones                                  | 7.5%                                           |                  | 68-70       | 01/06-09/11  |
| Proportion of patients prescribed other (non-fluoroquinolone) high risk antibiotics | 12.5%                                          |                  | 68-70       | 01/06-09/11  |
| Visitor behavior                                                                    |                                                |                  |             |              |
| Parameter                                                                           | Mean value                                     |                  | Source      | Source Dates |
| Probability of receiving visitors (per day)                                         | 0.5                                            |                  | 71,72       | 06/72-03/04  |
| Number of visitors per visit                                                        | 2                                              |                  | 72,73       | 2003-03/04   |
| Visitor length of stay                                                              | 15 minutes                                     |                  | 60,72-74    | 2003-08/10   |

|                                                |                                                 |    |             |
|------------------------------------------------|-------------------------------------------------|----|-------------|
| Visitor-environment contact probability [rate] | 0.932 (for 15 minutes) [0.179 contacts/ minute] | 60 | 06/10-08/10 |
|------------------------------------------------|-------------------------------------------------|----|-------------|

*eTable 3: Performance of infection control measures implemented at enhanced adherence, as quantified by NetLogo and Java simulation*

| Experiment                                     |                                 | NetLogo, 5000 replications (95% CI) | Java, 5000 replications (95% CI) | Percent change relative to baseline, NetLogo | Percent change relative to baseline, Java |
|------------------------------------------------|---------------------------------|-------------------------------------|----------------------------------|----------------------------------------------|-------------------------------------------|
| Baseline                                       | HO-CDI per 10000 patient days   | 7.98 (7.95, 8.02)                   | 7.98 (7.94, 8.01)                | -                                            | -                                         |
|                                                | Colonizations per 1000 patients | 32.51 (32.45, 32.57)                | 31.90 (31.84, 31.97)             | -                                            | -                                         |
| Daily cleaning enhanced                        | HO-CDI per 10000 patient days   | 2.48 (2.46, 2.50)                   | 2.49 (2.47, 2.51)                | 68.92%                                       | 68.81%                                    |
|                                                | Colonizations per 1000 patients | 7.32 (7.3, 7.35)                    | 7.20 (7.18, 7.23)                | 77.48%                                       | 77.42%                                    |
| Terminal cleaning enhanced                     | HO-CDI per 10000 patient days   | 6.52 (6.48, 6.55)                   | 6.45 (6.42, 6.49)                | 18.30%                                       | 19.11%                                    |
|                                                | Colonizations per 1000 patients | 23.57 (23.51, 23.62)                | 23.16 (23.11, 23.22)             | 27.50%                                       | 27.40%                                    |
| Healthcare work hand hygiene enhanced          | HO-CDI per 10000 patient days   | 5.37 (5.34, 5.40)                   | 5.31 (5.28, 5.34)                | 32.71%                                       | 33.43%                                    |
|                                                | Colonizations per 1000 patients | 20.26 (20.21, 20.31)                | 19.82 (19.77, 19.87)             | 37.68%                                       | 37.87%                                    |
| Patient hand hygiene enhanced                  | HO-CDI per 10000 patient days   | 7.09 (7.05, 7.12)                   | 7.04 (7.00, 7.07)                | 11.15%                                       | 11.80%                                    |
|                                                | Colonizations per 1000 patients | 28.19 (28.14, 28.25)                | 27.66 (27.6, 27.71)              | 13.29%                                       | 13.31%                                    |
| Visitor hand hygiene enhanced                  | HO-CDI per 10000 patient days   | 7.98 (7.94, 8.02)                   | 7.96 (7.93, 8.00)                | 0.00%                                        | 0.15%                                     |
|                                                | Colonizations per 1000 patients | 32.53 (32.47, 32.59)                | 31.88 (31.82, 31.94)             | -0.06%                                       | 0.07%                                     |
| Visitor contact precautions enhanced           | HO-CDI per 10000 patient days   | 7.97 (7.93, 8.00)                   | 7.96 (7.92, 8.00)                | 0.13%                                        | 0.17%                                     |
|                                                | Colonizations per 1000 patients | 32.51 (32.45, 32.57)                | 31.90 (31.83, 31.96)             | 0.00%                                        | 0.03%                                     |
| Healthcare worker contact precautions enhanced | HO-CDI per 10000 patient days   | 7.89 (7.86, 7.93)                   | 7.84 (7.80, 7.87)                | 1.13%                                        | 1.75%                                     |
|                                                | Colonizations per 1000 patients | 32.07 (32.01, 32.13)                | 31.45 (31.39, 31.51)             | 1.35%                                        | 1.43%                                     |
| Patient transfer enhanced                      | HO-CDI per 10000 patient days   | 7.64 (7.60, 7.67)                   | 7.60 (7.57, 7.64)                | 4.26%                                        | 4.70%                                     |
|                                                | Colonizations per 1000 patients | 30.34 (30.28, 30.4)                 | 29.75 (29.68, 29.81)             | 6.67%                                        | 6.77%                                     |
| Surveillance enhanced                          | HO-CDI per 10000 patient days   | 5.13 (5.10, 5.16)                   | 5.09 (5.06, 5.13)                | 35.71%                                       | 36.14%                                    |
|                                                | Colonizations per 1000 patients | 19.78 (19.72, 19.83)                | 19.44 (19.38, 19.50)             | 39.16%                                       | 39.06%                                    |

*eTable 4: Performance of infection control measures implemented at ideal adherence, as quantified by NetLogo and Java simulation*

| Experiment                         |                                 | NetLogo, 5000 replications (95% CI) | Java, 5000 replications (95% CI) | Percent change relative to baseline, NetLogo | Percent change relative to baseline, Java |
|------------------------------------|---------------------------------|-------------------------------------|----------------------------------|----------------------------------------------|-------------------------------------------|
| Baseline                           | HO-CDI per 10000 patient days   | 7.98 (7.95, 8.02)                   | 7.98 (7.94, 8.01)                | -                                            | -                                         |
|                                    | Colonizations per 1000 patients | 32.51 (32.45, 32.57)                | 31.9 (31.84, 31.97)              | -                                            | -                                         |
| Daily cleaning ideal               | HO-CDI per 10000 patient days   | 2.14 (2.12, 2.16)                   | 2.16 (2.14, 2.18)                | 73.19%                                       | 72.92%                                    |
|                                    | Colonizations per 1000 patients | 5.81 (5.79, 5.84)                   | 5.70 (5.68, 5.73)                | 82.12%                                       | 82.13%                                    |
| Terminal cleaning ideal            | HO-CDI per 10000 patient days   | 6.08 (6.05, 6.11)                   | 6.06 (6.02, 6.09)                | 23.84%                                       | 24.09%                                    |
|                                    | Colonizations per 1000 patients | 21.23 (21.18, 21.28)                | 20.87 (20.82, 20.92)             | 34.69%                                       | 34.59%                                    |
| Healthcare work hand hygiene ideal | HO-CDI per 10000 patient days   | 3.87 (3.84, 3.89)                   | 3.84 (3.81, 3.86)                | 51.59%                                       | 51.91%                                    |
|                                    | Colonizations per 1000 patients | 13.53 (13.49, 13.57)                | 13.23 (13.19, 13.27)             | 58.39%                                       | 58.55%                                    |
| Patient hand hygiene ideal         | HO-CDI per 10000 patient days   | 6.23 (6.20, 6.27)                   | 6.20 (6.17, 6.24)                | 21.94%                                       | 22.24%                                    |
|                                    | Colonizations per 1000 patients | 24.16 (24.11, 24.21)                | 23.67 (23.62, 23.73)             | 25.69%                                       | 25.80%                                    |
| Visitor hand hygiene ideal         | HO-CDI per 10000 patient days   | 8.00 (7.96, 8.03)                   | 7.94 (7.91, 7.98)                | -0.14%                                       | 0.40%                                     |
|                                    | Colonizations per 1000 patients | 32.51 (32.45, 32.57)                | 31.90 (31.83, 31.96)             | 0.01%                                        | 0.02%                                     |
| Visitor contact precautions ideal  | HO-CDI per 10000 patient days   | 7.99 (7.96, 8.03)                   | 7.97 (7.93, 8.01)                | -0.12%                                       | 0.11%                                     |
|                                    | Colonizations per 1000 patients | 32.52 (32.46, 32.58)                | 31.88 (31.81, 31.94)             | -0.03%                                       | 0.09%                                     |

| Experiment                                  |                                 | NetLogo, 5000 replications (95% CI) | Java, 5000 replications (95% CI) | Percent change relative to baseline, NetLogo | Percent change relative to baseline, Java |
|---------------------------------------------|---------------------------------|-------------------------------------|----------------------------------|----------------------------------------------|-------------------------------------------|
| Healthcare worker contact precautions ideal | HO-CDI per 10000 patient days   | 7.80 (7.76, 7.84)                   | 7.79 (7.76, 7.83)                | 2.29%                                        | 2.31%                                     |
|                                             | Colonizations per 1000 patients | 31.78 (31.72, 31.84)                | 31.16 (31.1, 31.22)              | 2.25%                                        | 2.33%                                     |
| Patient transfer ideal                      | HO-CDI per 10000 patient days   | 7.47 (7.44, 7.51)                   | 7.47 (7.44, 7.51)                | 6.40%                                        | 6.32%                                     |
|                                             | Colonizations per 1000 patients | 29.39 (29.34, 29.45)                | 28.85 (28.79, 28.91)             | 9.58%                                        | 9.58%                                     |
| Surveillance ideal                          | HO-CDI per 10000 patient days   | 5.06 (5.03, 5.09)                   | 5.02 (4.98, 5.05)                | 36.62%                                       | 37.12%                                    |
|                                             | Colonizations per 1000 patients | 19.43 (19.38, 19.49)                | 19.08 (19.02, 19.14)             | 40.22%                                       | 40.19%                                    |

*eTable 5: Stability of baseline infection outcomes as a function of number of replications, as quantified by NetLogo and Java models*

| Model   |                                 | Number of Replications |                      |                      |                      |                      |
|---------|---------------------------------|------------------------|----------------------|----------------------|----------------------|----------------------|
|         |                                 | 1000                   | 2000                 | 3000                 | 4000                 | 5000                 |
| NetLogo | HO-CDI per 10000 patient days   | 8.12 (8.03, 8.21)      | 8.06 (7.99, 8.12)    | 8.01 (7.96, 8.06)    | 8.01 (7.96, 8.05)    | 7.98 (7.95, 8.02)    |
|         | Colonizations per 1000 patients | 32.43 (32.3, 32.57)    | 32.43 (32.3, 32.57)  | 32.47 (32.39, 32.55) | 32.51 (32.44, 32.57) | 32.51 (32.45, 32.58) |
| Java    | HO-CDI per 10000 patient days   | 7.89 (7.81, 7.98)      | 7.96 (7.90, 8.02)    | 7.98 (7.93, 8.03)    | 7.98 (7.94, 8.02)    | 7.98 (7.95, 8.02)    |
|         | Colonizations per 1000 patients | 31.79 (31.66, 31.93)   | 31.89 (31.79, 31.98) | 31.93 (31.85, 32.01) | 31.90 (31.83, 31.97) | 32.51 (32.45, 32.57) |

*eTable 6: HO-CDI per 10,000 patient days as a function of compliance with surveillance, under maximal visitor transmission*

| Compliance with surveillance | VCPs de-implemented HO-CDI/ 10,000 patient days (95% CI) | VCPs Ideal HO-CDI/ 10,000 patient days (95% CI) | Change |
|------------------------------|----------------------------------------------------------|-------------------------------------------------|--------|
| 50%                          | 30.03 (29.96, 30.1)                                      | 29.77 (29.7, 29.84)                             | 0.89%  |
| 60%                          | 29.83 (29.76, 29.9)                                      | 29.54 (29.47, 29.62)                            | 0.97%  |
| 70%                          | 29.7 (29.63, 29.78)                                      | 29.47 (29.4, 29.54)                             | 0.80%  |
| 80%                          | 29.59 (29.52, 29.66)                                     | 29.17 (29.1, 29.24)                             | 1.42%  |
| 90%                          | 29.46 (29.39, 29.53)                                     | 28.92 (28.85, 28.99)                            | 1.85%  |
| 100%                         | 29.29 (29.22, 29.36)                                     | 28.63 (28.56, 28.7)                             | 2.25%  |

*eTable 7: HO-CDI per 10,000 patient days with VCPs in use for all patients*

| Description                                                   | VCPs de-implemented HO-CDI/ 10,000 patient days (95% CI) | VCPs Ideal HO-CDI/ 10,000 patient days (95% CI) | Change |
|---------------------------------------------------------------|----------------------------------------------------------|-------------------------------------------------|--------|
| Baseline conditions, VCPs available for use with all patients | 7.95 (7.91, 7.98)                                        | 7.95 (7.91, 7.99)                               | <1%    |



*eTable 8: Changes in hand hygiene and cleaning compliance associated with reduction in HO-CDI/10,000 patient days on par with that of VCPs ideal intervention*

| Intervention                | Baseline (no VCP use) |                            | Improved       |                            | Absolute percent reduction in HO-CDI rate |
|-----------------------------|-----------------------|----------------------------|----------------|----------------------------|-------------------------------------------|
|                             | Compliance (%)        | HO-CDI/10,000 Patient days | Compliance (%) | HO-CDI/10,000 Patient days |                                           |
| Visitor contact precautions | 0                     | 7.94 (7.91, 7.98)          | 93.5           | 7.97 (7.93, 8.01)          | < 1%                                      |
| Nurse hand hygiene          | 60                    | 7.94 (7.91, 7.98)          | 61             | 7.82 (7.78, 7.86)          | 2.01%                                     |
| Physician hand hygiene      | 50                    | 7.94 (7.91, 7.98)          | 51             | 7.90 (7.86, 7.94)          | 1.00%                                     |
| Daily cleaning              | 46                    | 7.94 (7.91, 7.98)          | 47             | 7.86 (7.82, 7.90)          | 1.50%                                     |
| Terminal cleaning           | 47                    | 7.94 (7.91, 7.98)          | 50             | 7.88 (7.84, 7.92)          | 1.25%                                     |

## eReferences

1. Barker AK, Alagoz O, Safdar N. Interventions to Reduce the Incidence of Hospital-Onset *Clostridium difficile* Infection: An Agent-Based Modeling Approach to Evaluate Clinical Effectiveness in Adult Acute Care Hospitals. *Clin Infect Dis*. 2018;66(8):1192-1203. doi:10.1093/cid/cix962
2. Davis C. Infection-free surgery: how to improve hand-hygiene compliance and eradicate methicillin-resistant *Staphylococcus aureus* from surgical wards. *Ann R Coll Surg Engl*. 2010;92(4):316-319. doi:10.1308/003588410X12628812459931
3. Srigley JA, Furness CD, Gardam M. Measurement of Patient Hand Hygiene in Multiorgan Transplant Units Using a Novel Technology: An Observational Study. *Infect Control Hosp Epidemiol*. 2014;35(11):1336-1341. doi:10.1086/678419
4. Cheng VCC, Wu AKL, Cheung CHY, et al. Outbreak of human metapneumovirus infection in psychiatric inpatients: implications for directly observed use of alcohol hand rub in prevention of nosocomial outbreaks. *J Hosp Infect*. 2007;67(4):336-343. doi:10.1016/j.jhin.2007.09.010
5. Randle J, Arthur A, Vaughan N, Wharrad H, Windle R. An observational study of hand hygiene adherence following the introduction of an education intervention. *J Infect Prev*. 2014;15(4):142-147. doi:10.1177/1757177414531057
6. Hedin G, Blomkvist A, Janson M, Lindblom A. Occurrence of potentially pathogenic bacteria on the hands of hospital patients before and after the introduction of patient hand disinfection. *APMIS*. 2012;120(10):802-807. doi:10.1111/j.1600-0463.2012.02912.x
7. Gagné D, Bédard G, Maziade PJ. Systematic patients' hand disinfection: impact on meticillin-resistant *Staphylococcus aureus* infection rates in a community hospital. *J Hosp Infect*. 2010;75(4):269-272. doi:10.1016/j.jhin.2010.02.028
8. Dierssen-Sotos T, Brugos-Llamazares V, Robles-García M, et al. Evaluating the impact of a hand hygiene campaign on improving adherence. *Am J Infect Control*. 2010;38(3):240-243. doi:10.1016/j.ajic.2009.08.014
9. Randle J, Firth J, Vaughan N. An observational study of hand hygiene compliance in paediatric wards. *J Clin Nurs*. 2013;22(17/18):2586-2592. doi:10.1111/j.1365-2702.2012.04103.x
10. Monistrol O, Calbo E, Riera M, et al. Impact of a hand hygiene educational programme on hospital-acquired infections in medical wards. *Clin Microbiol Infect*. 2012;18(12):1212-1218. doi:10.1111/j.1469-0691.2011.03735.x
11. Tromp M, Huis A, de Guchteneire I, et al. The short-term and long-term effectiveness of a multidisciplinary hand hygiene improvement program. *Am J Infect Control*. 2012;40(8):732-736. doi:10.1016/j.ajic.2011.09.009

12. Kowitt B, Jefferson J, Mermel LA. Factors associated with hand hygiene compliance at a tertiary care teaching hospital. *Infect Control Hosp Epidemiol.* 2013;34(11):1146-1152. doi:10.1086/673465
13. Mestre G, Berbel C, Tortajada P, et al. “The 3/3 Strategy”: A Successful Multifaceted Hospital Wide Hand Hygiene Intervention Based on WHO and Continuous Quality Improvement Methodology. *PLOS ONE.* 2012;7(10):e47200. doi:10.1371/journal.pone.0047200
14. Eldridge NE, Woods SS, Bonello RS, et al. Using the Six Sigma Process to Implement the Centers for Disease Control and Prevention Guideline for Hand Hygiene in 4 Intensive Care Units. *J Gen Intern Med.* 2006;21(Suppl 2):S35-S42. doi:10.1111/j.1525-1497.2006.00361.x
15. Zerr DM, Allpress AL, Heath J, Bornemann R, Bennett E. Decreasing hospital-associated rotavirus infection: a multidisciplinary hand hygiene campaign in a children’s hospital. *Pediatr Infect Dis J.* 2005;24(5):397-403.
16. Mayer J, Mooney B, Gundlapalli A, et al. Dissemination and sustainability of a hospital-wide hand hygiene program emphasizing positive reinforcement. *Infect Control Hosp Epidemiol.* 2011;32(1):59-66. doi:10.1086/657666
17. Muto CA, Blank MK, Marsh JW, et al. Control of an Outbreak of Infection with the Hypervirulent *Clostridium difficile* BI Strain in a University Hospital Using a Comprehensive “Bundle” Approach. *Clin Infect Dis.* 2007;45(10):1266-1273.
18. Grant AM, Hofmann DA. It’s Not All About Me: Motivating Hand Hygiene Among Health Care Professionals by Focusing on Patients. *Psychol Sci.* 2011;22(12):1494-1499. doi:10.1177/0956797611419172
19. Grayson ML, Russo PL, Cruickshank M, et al. Outcomes from the first 2 years of the Australian National Hand Hygiene Initiative. *Med J Aust.* 2011;195(10). Accessed May 9, 2017. <https://www.mja.com.au/journal/2011/195/10/outcomes-first-2-years-australian-national-hand-hygiene-initiative>
20. Pittet D, Simon A, Hugonnet S, Pessoa-Silva CL, Sauvan V, Perneger TV. Hand hygiene among physicians: performance, beliefs, and perceptions. *Ann Intern Med.* 2004;141(1):1-8.
21. Clock SA, Cohen B, Behta M, Ross B, Larson EL. Contact Precautions for Multidrug-Resistant Organisms (MDROs): Current Recommendations and Actual Practice. *Am J Infect Control.* 2010;38(2):105-111. doi:10.1016/j.ajic.2009.08.008
22. Birnbach DJ, Rosen LF, Fitzpatrick M, Arheart KL, Munoz-Price LS. An evaluation of hand hygiene in an intensive care unit: Are visitors a potential vector for pathogens? *J Infect Public Health.* 2015;8(6):570-574. doi:10.1016/j.jiph.2015.04.027

23. Birnbach DJ, Nevo I, Barnes S, et al. Do hospital visitors wash their hands? Assessing the use of alcohol-based hand sanitizer in a hospital lobby. *Am J Infect Control*. 2012;40(4):340-343. doi:10.1016/j.ajic.2011.05.006
24. Caroe Aarestrup S, Moesgaard F, Schuldt-Jensen J. NUDGING HOSPITAL VISITORS' HAND HYGIENE COMPLIANCE. Published online 2016. [http://inudgeyou.com/wp-content/uploads/2016/05/Hand\\_Hygiene.pdf](http://inudgeyou.com/wp-content/uploads/2016/05/Hand_Hygiene.pdf)
25. Nishimura S, Kagehira M, Kono F, Nishimura M, Taenaka N. Handwashing before entering the intensive care unit: What we learned from continuous video-camera surveillance. *Am J Infect Control*. 1999;27(4):367-369. doi:10.1016/S0196-6553(99)70058-1
26. Randle J, Arthur A, Vaughan N. Twenty-four-hour observational study of hospital hand hygiene compliance. *J Hosp Infect*. 2010;76(3):252-255. doi:10.1016/j.jhin.2010.06.027
27. Golan Y, Doron S, Griffith J, et al. The Impact of Gown-Use Requirement on Hand Hygiene Compliance. *Clin Infect Dis*. 2006;42(3):370-376. doi:10.1086/498906
28. Morgan DJ, Pineles L, Shardell M, et al. The effect of contact precautions on healthcare worker activity in acute care hospitals. *Infect Control Hosp Epidemiol*. 2013;34(1):69-73. doi:10.1086/668775
29. Swoboda SM, Earsing K, Strauss K, Lane S, Lipsett PA. Isolation status and voice prompts improve hand hygiene. *Am J Infect Control*. 2007;35(7):470-476. doi:10.1016/j.ajic.2006.09.009
30. Almaguer-Leyva M, Mendoza-Flores L, Medina-Torres AG, et al. Hand hygiene compliance in patients under contact precautions and in the general hospital population. *Am J Infect Control*. 2013;41(11):976-978. doi:10.1016/j.ajic.2013.05.003
31. Sitzlar B, Deshpande A, Fertelli D, Kundrapu S, Sethi AK, Donskey CJ. An environmental disinfection odyssey: evaluation of sequential interventions to improve disinfection of *Clostridium difficile* isolation rooms. *Infect Control Hosp Epidemiol*. 2013;34(5):459-465. doi:10.1086/670217
32. Goodman ER, Platt R, Bass R, Onderdonk AB, Yokoe DS, Huang SS. Impact of an Environmental Cleaning Intervention on the Presence of Methicillin-Resistant *Staphylococcus aureus* and Vancomycin-Resistant Enterococci on Surfaces in Intensive Care Unit Rooms. *Infect Control Hosp Epidemiol Off J Soc Hosp Epidemiol Am*. 2008;29(7):593-599. doi:10.1086/588566
33. Hayden MK, Bonten MJM, Blom DW, et al. Reduction in Acquisition of Vancomycin-Resistant Enterococcus after Enforcement of Routine Environmental Cleaning Measures. *Clin Infect Dis*. 2006;42(11):1552-1560. doi:10.1086/503845
34. Boyce JM, Havill NL, Dumigan DG, Golebiewski M, Balogun O, Rizvani R. Monitoring the effectiveness of hospital cleaning practices by use of an adenosine triphosphate

- bioluminescence assay. *Infect Control Hosp Epidemiol*. 2009;30(7):678-684. doi:10.1086/598243
35. Hess AS, Shardell M, Johnson JK, et al. A randomized, controlled trial of enhanced cleaning to reduce contamination of healthcare worker gowns and gloves with multidrug-resistant bacteria. *Infect Control Hosp Epidemiol Off J Soc Hosp Epidemiol Am*. 2013;34(5):487-493. doi:10.1086/670205
  36. Ramphal L, Suzuki S, McCracken IM, Addai A. Improving hospital staff compliance with environmental cleaning behavior. *Proc Bayl Univ Med Cent*. 2014;27(2):88-91.
  37. Anderson DJ, Chen LF, Weber DJ, et al. Enhanced terminal room disinfection and acquisition and infection caused by multidrug-resistant organisms and *Clostridium difficile* (the Benefits of Enhanced Terminal Room Disinfection study): a cluster-randomised, multicentre, crossover study. *The Lancet*. 2017;0(0). doi:10.1016/S0140-6736(16)31588-4
  38. Clifford R, Sparks M, Hosford E, et al. Correlating Cleaning Thoroughness with Effectiveness and Briefly Intervening to Affect Cleaning Outcomes: How Clean Is Cleaned? *PLoS ONE*. 2016;11(5). doi:10.1371/journal.pone.0155779
  39. Carling PC, Parry MM, Rupp ME, et al. Improving cleaning of the environment surrounding patients in 36 acute care hospitals. *Infect Control Hosp Epidemiol*. 2008;29(11):1035-1041. doi:10.1086/591940
  40. Agency for Healthcare Research and Quality. Healthcare Cost and Utilization Project Statistical Brief #180: Overview of Hospital stays in the United States, 2012. Published online 2012. <https://www.hcup-us.ahrq.gov/reports/statbriefs/sb180-Hospitalizations-United-States-2012.pdf>
  41. Centers for Disease Control. Number, rate, and average length of stay for discharges from short-stay hospitals, by age, region, and sex: United States, 2010. Published online 2010. [https://www.cdc.gov/nchs/data/nhds/1general/2010gen1\\_agesexualos.pdf](https://www.cdc.gov/nchs/data/nhds/1general/2010gen1_agesexualos.pdf)
  42. Hicks LA, Bartoces MG, Roberts RM, et al. US Outpatient Antibiotic Prescribing Variation According to Geography, Patient Population, and Provider Specialty in 2011. *Clin Infect Dis*. 2015;60(9):1308-1316. doi:10.1093/cid/civ076
  43. Frenk SM, Kit BK, Lukacs SL, Hicks LA, Gu Q. Trends in the use of prescription antibiotics: NHANES 1999–2012. Accessed January 16, 2017. <http://jac.oxfordjournals.org>
  44. Dantes R, Mu Y, Hicks LA, et al. Association Between Outpatient Antibiotic Prescribing Practices and Community-Associated *Clostridium difficile* Infection. *Open Forum Infect Dis*. 2015;2(3). doi:10.1093/ofid/ofv113
  45. Koo HL, Van JN, Zhao M, et al. Real-Time Polymerase Chain Reaction Detection of Asymptomatic *Clostridium difficile* Colonization and Rising *C. difficile*–Associated Disease Rates. *Infect Control Hosp Epidemiol*. 2014;35(6):667-673. doi:10.1086/676433

46. Alasmari F, Seiler SM, Hink T, Burnham C-AD, Dubberke ER. Prevalence and risk factors for asymptomatic clostridium difficile carriage. *Clin Infect Dis*. 2014;59(2):216-222. doi:10.1093/cid/ciu258
47. Leekha S, Aronhalt KC, Sloan LM, Patel R, Orenstein R. Asymptomatic Clostridium difficile colonization in a tertiary care hospital: Admission prevalence and risk factors. *Am J Infect Control*. 2013;41(5):390-393. doi:10.1016/j.ajic.2012.09.023
48. Loo VG, Bourgault A-M, Poirier L, et al. Host and Pathogen Factors for Clostridium difficile Infection and Colonization. *N Engl J Med*. 2011;365(18):1693-1703. doi:10.1056/NEJMoa1012413
49. Eyre DW, Griffiths D, Vaughan A, et al. Asymptomatic Clostridium difficile Colonisation and Onward Transmission. *PLOS ONE*. 2013;8(11):e78445. doi:10.1371/journal.pone.0078445
50. Longtin Y, Paquet-Bolduc B, Gilca R, et al. Effect of Detecting and Isolating Clostridium difficile Carriers at Hospital Admission on the Incidence of C difficile Infections: A Quasi-Experimental Controlled Study. *JAMA Intern Med*. 2016;176(6):796-804. doi:10.1001/jamainternmed.2016.0177
51. Nissle K, Kopf D, Rösler A. Asymptomatic and yet C. difficile-toxin positive? Prevalence and risk factors of carriers of toxigenic Clostridium difficile among geriatric in-patients. *BMC Geriatr*. 2016;16:185. doi:10.1186/s12877-016-0358-3
52. Kagan S, Wiener-Well Y, Ben-Chetrit E, et al. The risk for Clostridium difficile colitis during hospitalization in asymptomatic carriers. *J Hosp Infect*. doi:10.1016/j.jhin.2017.01.013
53. Gupta S, Mehta V, Herring T, et al. A Large Prospective North American Epidemiologic Study of Hospital-Associated Clostridium difficile Colonization & Infection. *Int Clostridium Difficile Symp Bled Slov*. 2012;Abstract 020.
54. Hung Y-P, Lin H-J, Wu T-C, et al. Risk Factors of Fecal Toxigenic or Non-Toxigenic Clostridium difficile Colonization: Impact of Toll-Like Receptor Polymorphisms and Prior Antibiotic Exposure. *PLOS ONE*. 2013;8(7):e69577. doi:10.1371/journal.pone.0069577
55. Dubberke ER, Burnham C-AD. Diagnosis of Clostridium difficile Infection: Treat the Patient, Not the Test. *JAMA Intern Med*. 2015;175(11):1801-1802. doi:10.1001/jamainternmed.2015.4607
56. Lucado J, Gould C, Elixhauser A. Clostridium Difficile Infections (CDI) in Hospital Stays, 2009: Statistical Brief #124. In: *Healthcare Cost and Utilization Project (HCUP) Statistical Briefs*. Agency for Healthcare Research and Quality (US); 2012. Accessed February 19, 2017. <http://www.ncbi.nlm.nih.gov/books/NBK92613/>

57. Evans ME, Simbartl LA, Kralovic SM, Jain R, Roselle GA. Clostridium difficile Infections in Veterans Health Administration Acute Care Facilities. *Infect Control Hosp Epidemiol*. 2014;35(8):1037-1042. doi:10.1086/677151
58. American Hospital Association. AHA Hospital Statistics. Published online 2016.
59. Centers for Disease Control. Table 89. Hospitals, beds, and occupancy rates, by type of ownership and size of hospital: United States, selected years 1975–2013. Published online 2015. <https://www.cdc.gov/nchs/data/hus/2015/089.pdf>
60. Cohen B, Hyman S, Rosenberg L, Larson E. Frequency of Patient Contact with Health Care Personnel and Visitors: Implications for Infection Prevention. *Jt Comm J Qual Patient Saf Jt Comm Resour*. 2012;38(12):560-565.
61. California Code of Regulations. Nurse service staff 2003. 22 C.C.R., Sec. 70217. Published online July 1, 2003. [https://govt.westlaw.com/calregs/Document/I8612C410941F11E29091E6B951DDF6CE?viewType=FullText&originationContext=documenttoc&transitionType=CategoryPageItem&contextData=\(sc.Default&bhcp=1](https://govt.westlaw.com/calregs/Document/I8612C410941F11E29091E6B951DDF6CE?viewType=FullText&originationContext=documenttoc&transitionType=CategoryPageItem&contextData=(sc.Default&bhcp=1)
62. Spetz J, Donaldson N, Aydin C, Brown DS. How Many Nurses per Patient? Measurements of Nurse Staffing in Health Services Research. *Health Serv Res*. 2008;43(5 Pt 1):1674-1692. doi:10.1111/j.1475-6773.2008.00850.x
63. Aiken LH, Clarke SP, Sloane DM, Sochalski J, Silber JH. Hospital Nurse Staffing and Patient Mortality, Nurse Burnout, and Job Dissatisfaction. *JAMA*. 2002;288(16):1987-1993. doi:10.1001/jama.288.16.1987
64. Evans HL, Shaffer MM, Hughes MG, et al. Contact isolation in surgical patients: A barrier to care? *Surgery*. 2003;134(2):180-188. doi:10.1067/msy.2003.222
65. Barker AK, Codella J, Ewers T, Dundon A, Alagoz O, Safdar N. Changes to physician and nurse time burdens when caring for patients under contact precautions. *Am J Infect Control*. 2017;45(5):542-543. doi:10.1016/j.ajic.2017.01.026
66. Rubin MA, Jones M, Leecaster M, et al. A Simulation-Based Assessment of Strategies to Control Clostridium Difficile Transmission and Infection. *PLoS ONE*. 2013;8(11). doi:10.1371/journal.pone.0080671
67. McArdle FI, Lee RJ, Gibb AP, Walsh TS. How much time is needed for hand hygiene in intensive care? A prospective trained observer study of rates of contact between healthcare workers and intensive care patients. *J Hosp Infect*. 2006;62(3):304-310. doi:10.1016/j.jhin.2005.09.019
68. Magill SS, Edwards JR, Beldavs ZG, et al. Prevalence of antimicrobial use in US acute care hospitals, May-September 2011. *JAMA*. 2014;312(14):1438-1446. doi:10.1001/jama.2014.12923

69. Baggs J, Fridkin SK, Pollack LA, Srinivasan A, Jernigan JA. Estimating National Trends in Inpatient Antibiotic Use Among US Hospitals From 2006 to 2012. *JAMA Intern Med.* 2016;176(11):1639-1648. doi:10.1001/jamainternmed.2016.5651
70. Fridkin S, Baggs J, Fagan R, et al. Vital Signs: Improving Antibiotic Use Among Hospitalized Patients. Published online March 2014.
71. Cross KW, Turner RD. Factors affecting the visiting pattern of geriatric patients in a rural area. *Br J Prev Soc Med.* 1974;28(2):133-139.
72. Eriksson T, Bergbom I. Visits to intensive care unit patients--frequency, duration and impact on outcome. *Nurs Crit Care.* 2007;12(1):20-26. doi:10.1111/j.1478-5153.2006.00196.x
73. Gonzalez CE, Carroll DL, Elliott JS, Fitzgerald PA, Vallent HJ. Visiting preferences of patients in the intensive care unit and in a complex care medical unit. *Am J Crit Care Off Publ Am Assoc Crit-Care Nurses.* 2004;13(3):194-198.
74. Fumagalli S, Boncinelli L, Lo Nostro A, et al. Reduced cardiocirculatory complications with unrestrictive visiting policy in an intensive care unit: results from a pilot, randomized trial. *Circulation.* 2006;113(7):946-952. doi:10.1161/CIRCULATIONAHA.105.572537
